# Supplementary material
Source: publisher figshare collection journal article supplement (https://frontiersin.figshare.com/ndownloader/files/21021771)
Supplement: Supplementary file 1 [file 21021771]

## *Supplementary Material*

### **Selective growth of metal sulfide, metal, and metal-alloy on 2D CdS nanoplates**

**Helena Fridman<sup>1,2</sup>, Liang Tian<sup>1,2</sup>, Karam Shreteh<sup>1</sup>, Michael Volokh<sup>1</sup>, Taleb Mokari<sup>\*1</sup>**

<sup>1</sup>Department of Chemistry and Ilse Katz Institute for Nanoscale Science and Technology, Ben-Gurion University of the Negev, Beer-Sheva 8410501, Israel

<sup>2</sup>Equal contribution

**\* Correspondence:**

Taleb Mokari

[mokari@bgu.ac.il](mailto:mokari@bgu.ac.il)

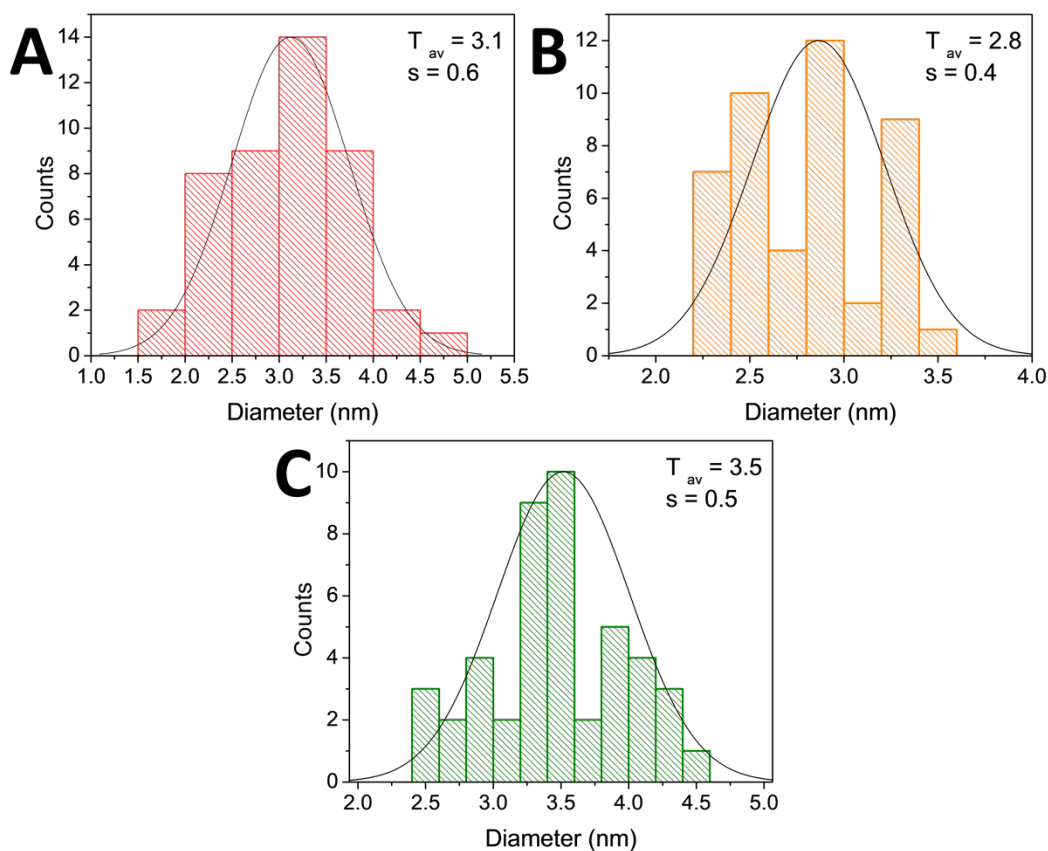

**Supplementary Figure 1.** Particle size distribution histograms: (A) Au, (B) Pt, and (C) PtNi metal domains, which decorate CdS nanoplates in the formed HNSs (in each sample, 45 total particles measured).

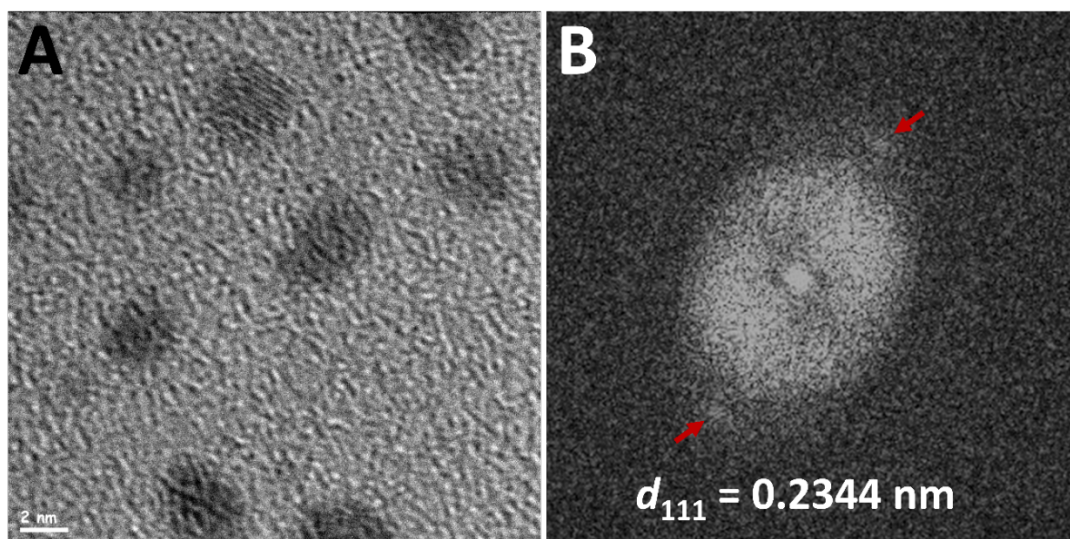

**Supplementary Figure 2.** High resolution TEM image of Au–CdS HNSs (A), and the corresponding FFT analysis (B), showing signal from the (111) planes of the gold domains.

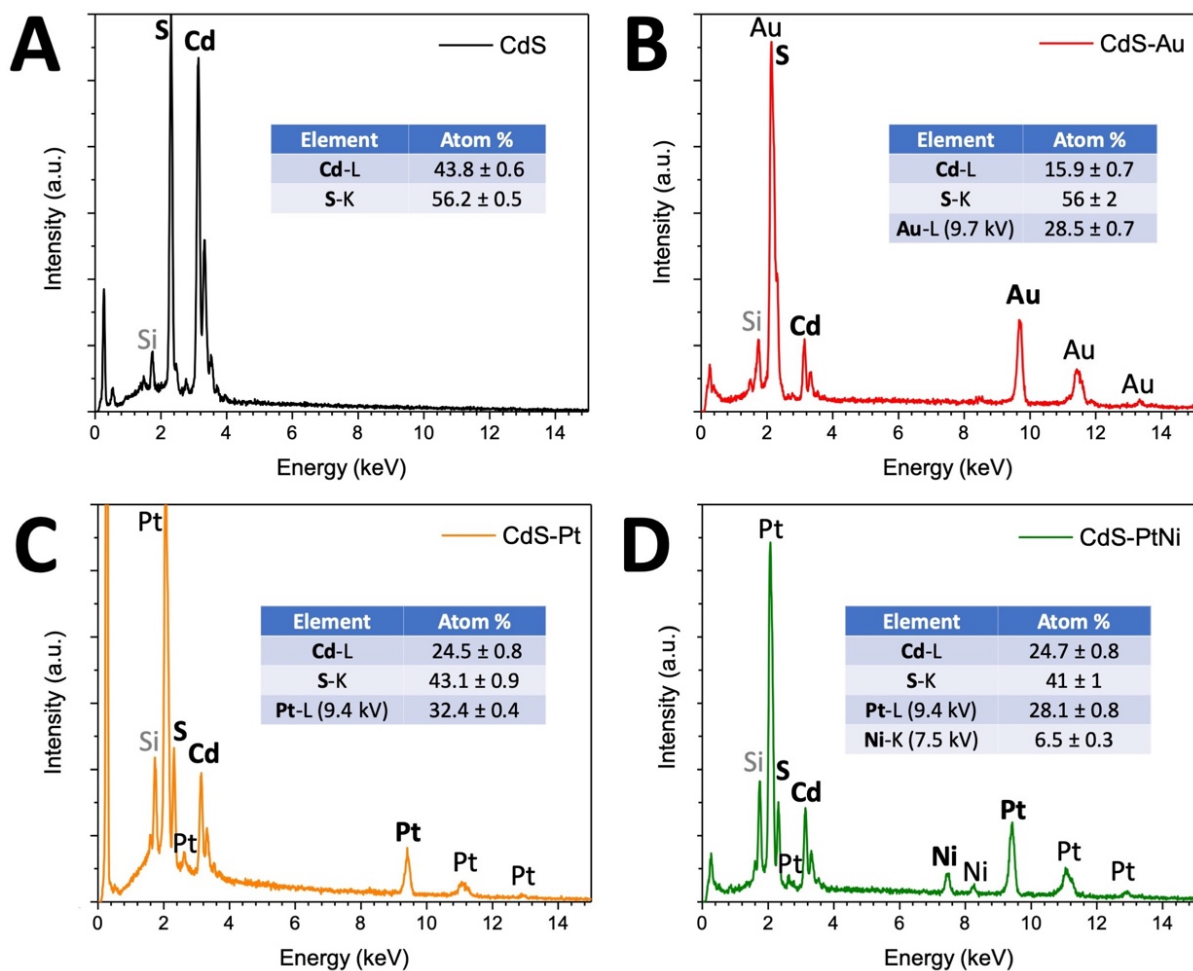

**Supplementary Figure 3.** EDS spectra of CdS and M-SC samples obtained using an SEM instrument over Si substrates. Quantitative analysis was performed using a Proza (rho-phi-Z) filter correction algorithm.

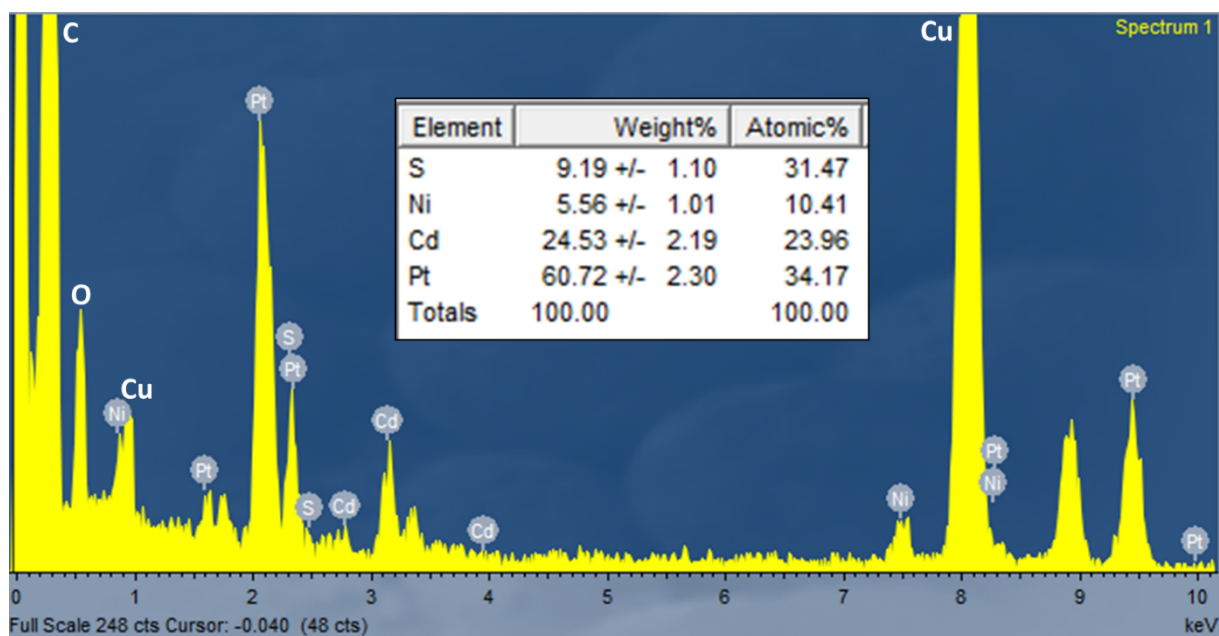

**Supplementary Figure 4.** EDS data of CdS-PtNi obtained from magnification on a TEM instrument.

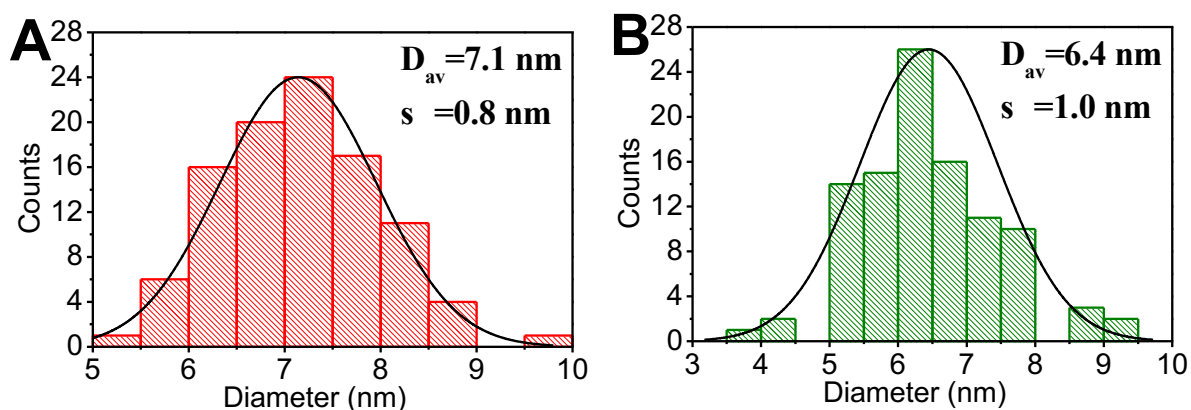

**Supplementary Figure 5.** Size distribution histogram of  $\text{Cu}_{2-x}\text{S}$  nanoparticles decorating CdS nanoplates (A) and elongated CdS nanoplates (B) (total particles measured = 100).

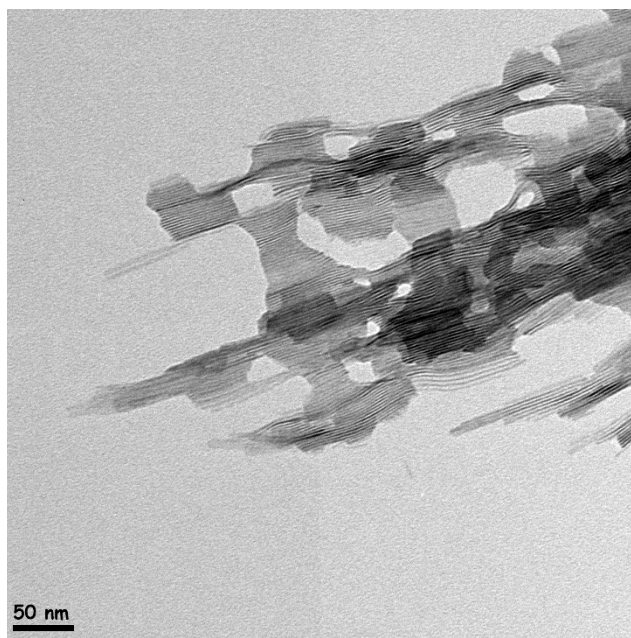

**Supplementary Figure 6.** TEM image of elongated CdS nanoplates.

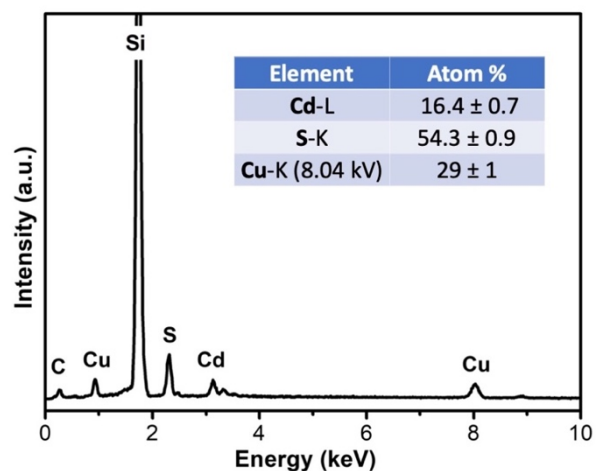

**Supplementary Figure 7.** EDS spectrum of  $\text{Cu}_{2-x}\text{S}$ -CdS obtained using an SEM instrument over a Si substrate. Quantitative analysis was performed using a Proza (rho-phi-Z) filter correction algorithm of the bulk  $\text{Cu}_{2-x}\text{S}$ -CdS gives a value of  $x$  *ca.* 0.6. The reasons for the inaccuracy are discussed in the results and discussion section.

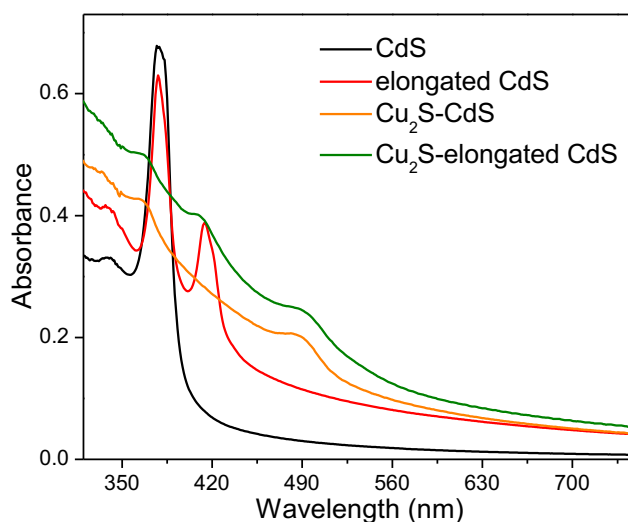

**Supplementary Figure 8.** UV-vis absorption spectra of CdS nanoplates and their HNSs with  $\text{Cu}_{2-x}\text{S}$ .



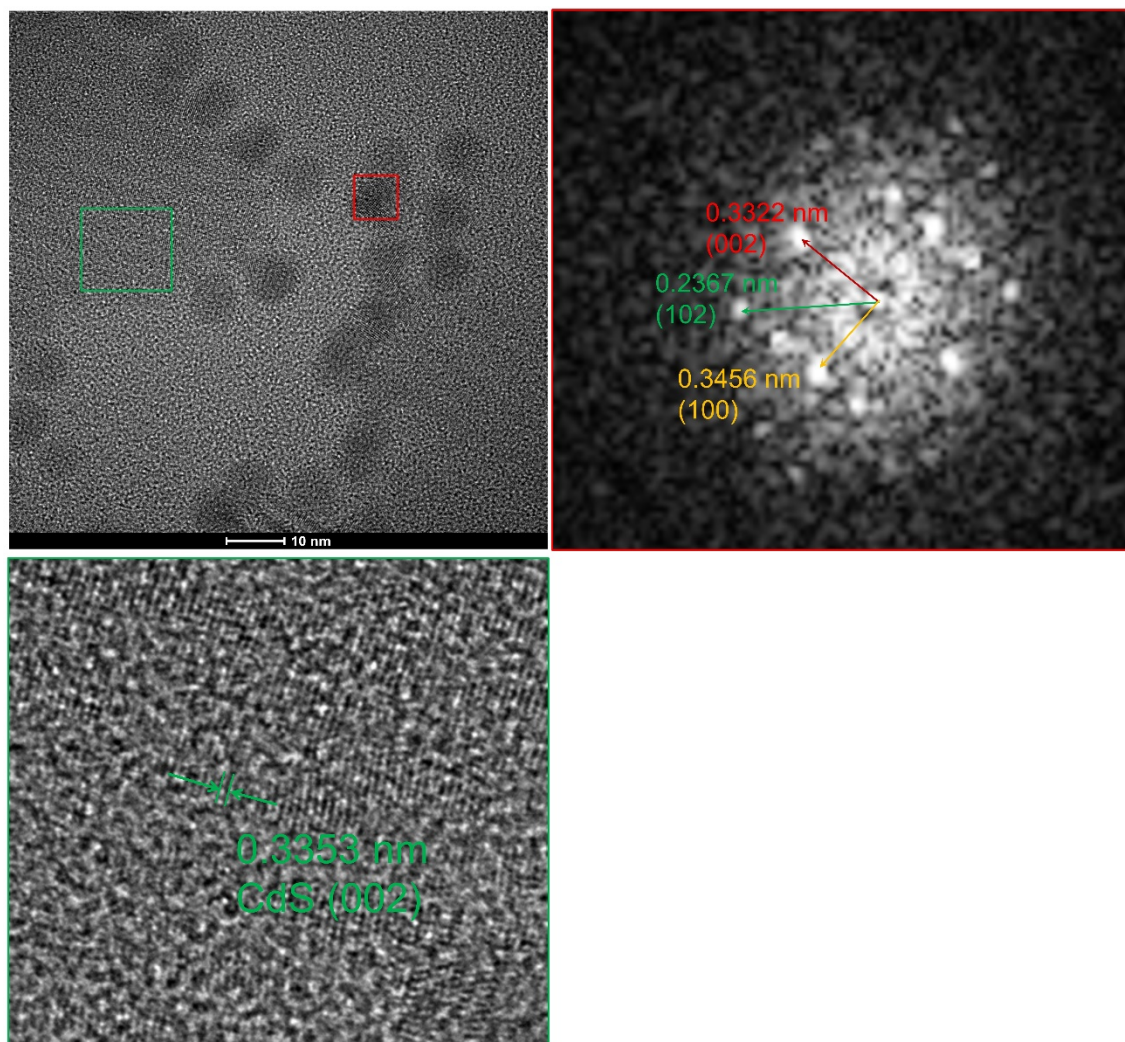

**Supplementary Figure 9.** HRTEM image and FFT analyses of  $\text{Cu}_{2-x}\text{S}$ -CdS HNSs.

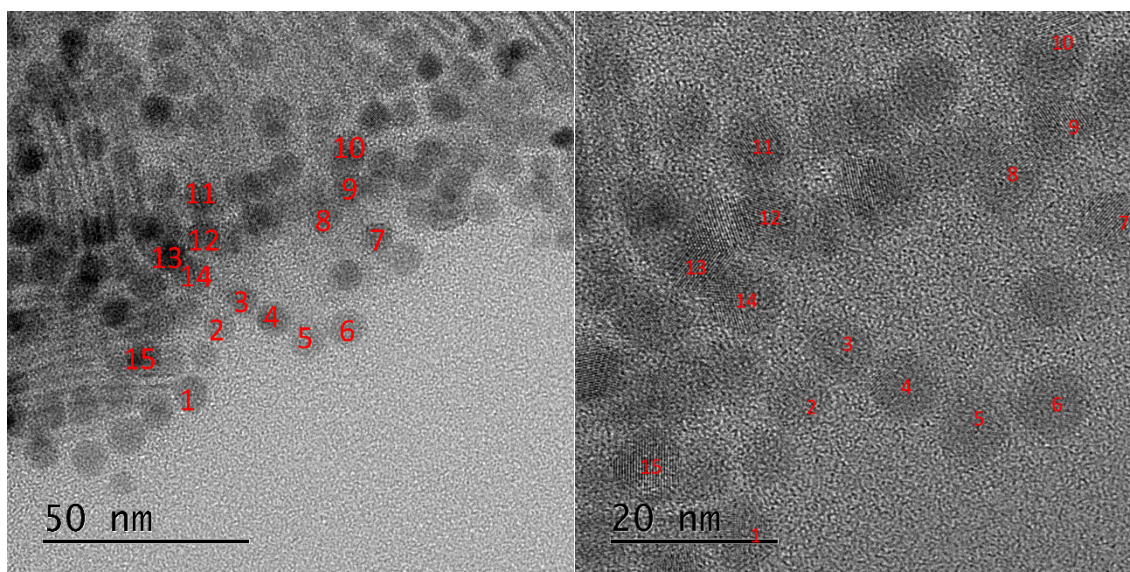

**Supplementary Figure 10.** TEM and HRTEM images of  $\text{Cu}_{2-x}\text{S}$ -CdS HNSs.



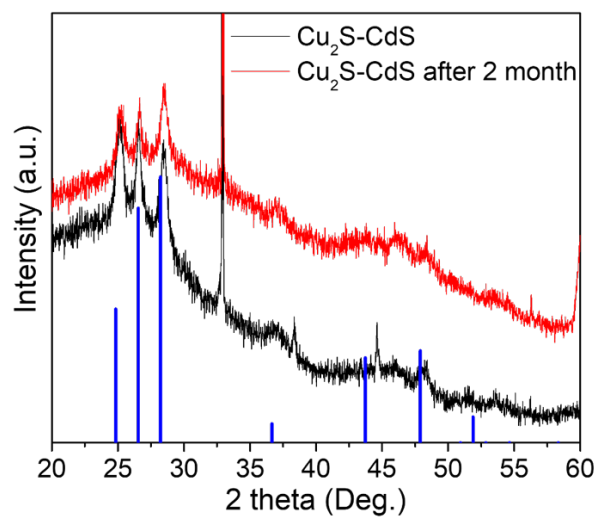

**Supplementary Figure 11.** XRD patterns of Cu<sub>2-x</sub>S–CdS HNSs both fresh (black pattern) and 2 months after synthesis (red pattern). The strong and narrow diffraction signal at 33° is attributed to the Si substrate.

**Supplementary Table 1.** The measured lattice distances of  $\text{Cu}_{2-x}\text{S}$  nanoparticles in Figure S10. For each particle, the lattice distance was calculated by measuring 10 planes in the HRTEM image.

| <i>Nanoparticle<br/>number</i> | <i>Measured value of<br/>lattice distance (nm)</i> | <i>Corresponding<br/>crystal plane (hkl)</i> | <i>Theoretical<br/>lattice distance<br/>(nm)</i> | <i>Mismatch<br/>(%)</i> |
|--------------------------------|----------------------------------------------------|----------------------------------------------|--------------------------------------------------|-------------------------|
| 1                              | 0.2020                                             | 110                                          | 0.2017                                           | 0.15                    |
| 2                              | 0.3045                                             | 101                                          | 0.3101                                           | -1.81                   |
| 3                              | 0.1925                                             | 103                                          | 0.1889                                           | 1.91                    |
| 4                              | 0.3310                                             | 002                                          | 0.3370                                           | -1.78                   |
| 5                              | 0.2425                                             | 102                                          | 0.2425                                           | 0                       |
| 6                              | 0.2417                                             | 102                                          | 0.2425                                           | -0.33                   |
| 7                              | 0.3307                                             | 002                                          | 0.3370                                           | -1.87                   |
| 8                              | 0.3113                                             | 101                                          | 0.3101                                           | 0.39                    |
| 9                              | 0.3123                                             | 101                                          | 0.3101                                           | 0.71                    |
| 10                             | 0.3131                                             | 101                                          | 0.3101                                           | 0.97                    |
| 11                             | 0.3123                                             | 101                                          | 0.3101                                           | 0.71                    |
| 12                             | 0.3099                                             | 101                                          | 0.3101                                           | -0.06                   |
| 13                             | 0.3310                                             | 002                                          | 0.3370                                           | -1.78                   |
| 14                             | 0.3311                                             | 002                                          | 0.3370                                           | -1.75                   |
| 15                             | 0.3377                                             | 002                                          | 0.3370                                           | 0.21                    |
